# Supplementary material for: Importance of polarization assisted/resonance assisted hydrogen bonding interactions and unconventional interactions in crystal formations of five new complexes bearing chelidamic acid through a proton transfer mechanism
Source: Royal Society of Chemistry journal article supplement (doi:10.1039/c5ra09526c), 2015-01-01
Supplement: c5ra09526c1.pdf [file c5ra09526c1.pdf]

**Appendix A. Supplementary material**

CCDC 1056388-1056391 (**1-4**) and 1402098 (**5**) contain the supplementary crystallographic data for this paper. These data can be obtained free of charge from The Cambridge Crystallographic Data Centre *via* [www.ccdc.cam.ac.uk/data\\_request/cif](http://www.ccdc.cam.ac.uk/data_request/cif). Supplementary data associated with this article can be found, in the online version.

**Table S1.** Selected Bond Lengths (Å) and Angles (deg) for **1-4**.**Compound 1**

|            |            |                 |            |
|------------|------------|-----------------|------------|
| Cr(1)—O(1) | 2.006(2)   | O(3)—Cr(1)—O(1) | 157.03(8)  |
| Cr(1)—O(3) | 1.9841(19) | O(3)—Cr(1)—O(6) | 90.04(8)   |
| Cr(1)—O(6) | 2.001(2)   | O(6)—Cr(1)—O(1) | 93.88(8)   |
| Cr(1)—O(8) | 2.013(2)   | N(2)—Cr(1)—O(8) | 78.04(9)   |
| Cr(1)—N(1) | 1.967(2)   | N(2)—Cr(1)—N(1) | 177.53(10) |
| Cr(1)—N(2) | 1.969(2)   | C(1)—O(1)—Cr(1) | 117.77(18) |
| O(1)—C(1)  | 1.286(3)   | C(7)—O(3)—Cr(1) | 117.90(17) |
| O(2)—C(1)  | 1.236(3)   | N(1)—Cr(1)—O(1) | 78.12(9)   |
| O(3)—C(7)  | 1.300(3)   | N(1)—Cr(1)—O(3) | 78.91(9)   |
| O(4)—C(7)  | 1.222(3)   | C(2)—N(1)—C(6)  | 121.9(2)   |
| O(5)—C(4)  | 1.324(3)   | C(6)—N(1)—Cr(1) | 118.52(18) |

**Compound 2**

|            |          |                 |            |
|------------|----------|-----------------|------------|
| Cr(1)—O(1) | 1.997(3) | O(3)—Cr(1)—O(1) | 157.57(12) |
| Cr(1)—O(3) | 1.988(3) | O(6)—Cr(1)—O(1) | 91.72(12)  |
| Cr(1)—O(6) | 1.97(3)  | O(6)—Cr(1)—O(3) | 91.67(10)  |
| Cr(1)—O(8) | 1.986(3) | O(6)—Cr(1)—O(8) | 158.32(12) |
| Cr(1)—N(1) | 1.964(3) | N(1)—Cr(1)—O(1) | 78.52(12)  |
| Cr(1)—N(2) | 1.955(3) | N(1)—Cr(1)—O(3) | 79.07(12)  |
| O(1)—C(1)  | 1.289(5) | N(1)—Cr(1)—O(6) | 100.74(12) |
| O(2)—C(1)  | 1.225(5) | N(1)—Cr(1)—O(8) | 100.92(12) |
| O(3)—C(7)  | 1.298(4) | C(1)—O(1)—Cr(1) | 118.3(2)   |
| O(4)—C(7)  | 1.226(5) | C(7)—O(3)—Cr(1) | 117.5(2)   |
| O(5)—C(4)  | 1.332(5) | C(8)—O(6)—Cr(1) | 117.3(2)   |

**Compound 3**

|             |             |                  |            |
|-------------|-------------|------------------|------------|
| Co(1)—O(7)  | 2.0163 (14) | O(7)—Co(1)—N(1)  | 173.50 (6) |
| Co(1)—N(1)  | 2.0268 (16) | O(7)—Co(1)—O(8)  | 85.68 (6)  |
| Co(1)—O(8)  | 2.1244 (17) | N(1)—Co(1)—O(8)  | 93.22 (6)  |
| Co(1)—O(6)  | 2.1312 (15) | O(7)—Co(1)—O(6)  | 86.06 (6)  |
| Co(1)—O(1)A | 2.160 (4)   | N(1)—Co(1)—O(6)  | 95.49 (6)  |
| Co(1)—O(1)  | 2.1596 (19) | O(8)—Co(1)—O(6)  | 170.56 (6) |
| Co(1)—O(3)  | 2.1988 (15) |                  |            |
| O(1)—C(1)   | 1.273 (9)   | O(7)—Co(1)—O(1)A | 98.5 (7)   |
| O(2)—C(1)   | 1.248 (3)   | N(1)—Co(1)—O(1)A | 75.1 (8)   |
| O(3)—C(7)   | 1.278 (2)   | O(8)—Co(1)—O(1)A | 91 (4)     |
| O(4)—C(7)   | 1.237 (3)   | O(6)—Co(1)—O(1)A | 95(4)      |

**Compound 4**

|             |           |                 |            |
|-------------|-----------|-----------------|------------|
| Ni(1)—N(1)  | 1.964 (2) | N(1)—Ni(1)—O(7) | 176.40 (9) |
| Ni(1)—O(7)  | 2.010 (2) | N(1)—Ni(1)—O(6) | 95.17 (9)  |
| Ni(1)—O(6)  | 2.079 (2) | O(7)—Ni(1)—O(6) | 85.76 (9)  |
| Ni(1)—O(8)  | 2.081 (2) | N(1)—Ni(1)—O(8) | 95.05 (9)  |
| Ni(1)—O(1)A | 2.121 (2) | O(7)—Ni(1)—O(8) | 86.210 (9) |
| Ni(1)—O(1)  | 2.121 (2) | O(6)—Ni(1)—O(8) | 171.20 (9) |
| Ni(1)—O(3)  | 2.190 (2) | N(1)—Ni(1)—O(1) | 79.0 (3)   |
| O(3)—C(7)   | 1.281 (3) | O(7)—Ni(1)—O(1) | 97.6 (3)   |

|           |           |                 |           |
|-----------|-----------|-----------------|-----------|
| O(2)—C(1) | 1.248 (4) | O(6)—Ni(1)—O(1) | 90.7(2)   |
| O(3)—C(7) | 1.281 (3) | O(8)—Ni(1)—O(1) | 94.07 (2) |
| O(4)—C(7) | 1.240 (3) | N(1)—Ni(1)—O(3) | 76.64 (8) |

**Table S2.** Selected Hydrogen-bond geometry (Å, °) **1-4**

**Compound 1**

| DHA<D—H...A                       | d(D—H) | d(H...A) | d(D...A) | d(D—H...A) |
|-----------------------------------|--------|----------|----------|------------|
| O(5)—H(5A)···O(28) <sup>a</sup>   | 0.84   | 1.74     | 2.574(3) | 172        |
| O(10)—H(10A)···O(14) <sup>b</sup> | 0.84   | 1.77     | 2.599(3) | 168        |
| O(15)—H(15A)···O(26) <sup>c</sup> | 0.84   | 1.73     | 2.557(3) | 168        |
| O(20)—H(20A)···O(22) <sup>d</sup> | 0.84   | 1.67     | 2.509(3) | 176        |
| N(5)—H(5N)···O(25) <sup>b</sup>   | 0.91   | 1.86     | 2.768(5) | 177        |
| N(7)—H(7N)···O(23) <sup>e</sup>   | 0.91   | 1.80     | 2.666(6) | 159        |
| O(21)—H(21A)···O(19) <sup>g</sup> | 0.84   | 1.93     | 2.766(3) | 174        |
| O(21)—H(21B)O(9)                  | 0.84   | 1.87     | 2.696(3) | 170        |
| O(22)—H(22A)···O(4)               | 0.84   | 1.89     | 2.708(3) | 164        |
| O(22)—H(22B)···O(21) <sup>b</sup> | 0.84   | 1.84     | 2.672(3) | 170        |
| O(23)—H(23A)···O(21) <sup>f</sup> | 0.84   | 1.92     | 2.761(5) | 175        |
| O(23)—H(23B)···O(17) <sup>h</sup> | 0.84   | 2.19     | 2.903(6) | 143        |
| O(24)—H(24A)···O(9) <sup>f</sup>  | 0.84   | 2.11     | 2.897(6) | 156        |
| O(24)—H(24B)···O(13) <sup>h</sup> | 0.84   | 2.03     | 2.861(6) | 172        |
| O(25)—H(25A)···O(16) <sup>h</sup> | 0.84   | 2.11     | 2.944(4) | 172        |

**Compound 2**

|                                   |      |      |          |     |
|-----------------------------------|------|------|----------|-----|
| O(5)—H(5O)···O(12)                | 0.84 | 1.80 | 2.625(4) | 166 |
| O(10)—H(10O)···O(11) <sup>a</sup> | 0.84 | 1.83 | 2.613(4) | 154 |
| N(5)—H(5A)···O(1) <sup>b</sup>    | 0.91 | 2.04 | 2.881(4) | 153 |
| N(5)—H(5B)···N(7) <sup>c</sup>    | 0.91 | 2.14 | 3.046(5) | 170 |
| N(6)—H(6N)···O(13)                | 0.91 | 2.11 | 2.698(5) | 166 |
| N(8)—H(8A)···O(8) <sup>d</sup>    | 0.91 | 2.11 | 2.893(4) | 144 |
| N(8)—H(8B)···N(4) <sup>e</sup>    | 0.91 | 2.03 | 2.933(5) | 172 |
| O(11)—H(11A)···O(4) <sup>f</sup>  | 0.84 | 2.14 | 2.904(4) | 157 |

**Compound 3**

|                                |      |      |            |      |
|--------------------------------|------|------|------------|------|
| O(5)—H(5A)···O(3) <sup>a</sup> | 0.84 | 1.80 | 2.632 (2)  | 170  |
| O(6)—H(6B)···O(4) <sup>b</sup> | 0.84 | 2.02 | 2.823 (2)  | 160  |
| O(6)—H(6B)···O(9) <sup>c</sup> | 0.84 | 2.03 | 2.846 (2)  | 165  |
| O(7)—H(7B)···O(1) <sup>d</sup> | 0.84 | 1.91 | 2.710 (14) | 160  |
| O(8)—H(8A)···O(9) <sup>d</sup> | 0.84 | 1.95 | 2.782 (14) | 169  |
| O(8)—H(8B)···O(4) <sup>e</sup> | 0.84 | 1.90 | 2.708 (2)  | 162  |
| C(3)—H(3)···O(7) <sup>a</sup>  | 0.95 | 2.62 | 3.519 (2)  | 1586 |
| O(9)—H(9A)···O(2) <sup>c</sup> | 0.84 | 2.28 | 2.882 (2)  | 129  |

**Compound 4**

|                                |      |      |           |     |
|--------------------------------|------|------|-----------|-----|
| O(9)—H(9B)···O(2) <sup>a</sup> | 0.84 | 2.08 | 2.898 (4) | 163 |
|--------------------------------|------|------|-----------|-----|

|                                |      |      |            |     |
|--------------------------------|------|------|------------|-----|
| O(9)—H(9)A···O(2)              | 0.84 | 1.90 | 2.717 (4)  | 166 |
| O(8)—H(8B)···O(4) <sup>b</sup> | 0.84 | 2.04 | 2.836 (3)  | 157 |
| O(8)—H(8A)···O(9) <sup>a</sup> | 0.84 | 2.02 | 2.830 (3)  | 161 |
| O(7)—H(7A)···O(1) <sup>c</sup> | 0.84 | 1.94 | 2.756 (10) | 164 |
| O(6)—H(6B)···O(9) <sup>c</sup> | 0.84 | 1.96 | 2.797 (3)  | 170 |
| O(6)—H(6A)···O(4) <sup>d</sup> | 0.84 | 1.88 | 2.699 (3)  | 165 |
| O(5)—H(5A)···O(3) <sup>e</sup> | 0.84 | 1.80 | 2.619 (3)  | 166 |

Footnotes indicating symmetry operations for Table S2.

**Compound 1:** <sup>a</sup>x,y,-1+z; <sup>b</sup>x,1+y,z; <sup>c</sup>x,-1+y,z; <sup>d</sup>x,-1+y,1+z; <sup>e</sup>x,1+y,1+z; <sup>f</sup>1+x,y,z; <sup>g</sup>-x,-1-y,1-z; <sup>h</sup>1-x,-y,1-z.

**Compound 2:** <sup>a</sup>1+x,y,1+z; <sup>b</sup>-0.5+x,1.5-y,-1+z; <sup>c</sup>x,1+y,-1+z; <sup>d</sup>x,-1+y,z; <sup>e</sup>x,-1+y,1+z; <sup>f</sup>-0.5+x,0.5-y,-1+z.

**Compound 3:** <sup>a</sup>0.5+x,0.5+y,z; <sup>b</sup>1-x,1-y,1-z; <sup>c</sup>1.5-x,-0.5+y,0.5-z; <sup>d</sup>1-x,y,0.5-z; <sup>e</sup>1-x,2-y,1-z.

**Compound 4:** <sup>a</sup>0.5-x,0.5-y,1.5-z; <sup>b</sup>1-x,1-y,1-z; <sup>c</sup>1-x,y,1.5-z; <sup>d</sup>1-x,-y,1-z; <sup>e</sup>-0.5+x,-0.5+y,z.
